# Supplementary material
Source: PubMed Central journal article supplement (PMC2582303)
Supplement: 0803850105_Appendix_PDF.pdf [file 0803850105_Appendix_PDF.pdf]

# Analytical distributions for stochastic gene expression: Supporting information

Vahid Shahrezaei and Peter S. Swain

## Derivation of the protein distribution for a two-stage model of gene expression

### From the master equation

The generating function for the master equation of the two-stage model satisfies (Eq. 1 in the main text)

$$\frac{1}{v} \frac{\partial F}{\partial \tau} + \frac{\partial F}{\partial v} - \gamma \left[ b(1+u) - \frac{u}{v} \right] \frac{\partial F}{\partial u} = a \frac{u}{v} F \quad (23)$$

where  $F(z', z)$  is defined as  $\sum_{m,n} (z')^m z^n P_{m,n}$ , and we have let  $u = z' - 1$  and  $v = z - 1$ . If  $r$  measure the distance along a characteristic which starts at  $\tau = 0$  with  $u = u_0$  and  $v = v_0$  for some constant  $u_0$  and  $v_0$ , then Eq. 23 becomes

$$\begin{aligned} \frac{dv}{dr} &= 1 & ; & \frac{d\tau}{dr} = \frac{1}{v} \\ \frac{du}{dr} &= -\gamma \left[ b(1+u) - \frac{u}{v} \right] & ; & \frac{dF}{dr} = \frac{au}{v} F. \end{aligned} \quad (24)$$

Consequently,  $v = r$  and

$$\frac{du}{dv} = -\gamma \left[ b(1+u) - \frac{u}{v} \right] \quad (25)$$

which has solution

$$u(v) = e^{-\gamma bv} v^\gamma \left[ C - b\gamma \int^v dv' \frac{e^{\gamma bv'}}{v'^\gamma} \right] \quad (26)$$

for a constant  $C$  as can be verified by differentiation. By Taylor expanding  $e^{\gamma bv}$  so that  $e^{\gamma bv} = \sum_n \frac{(\gamma bv)^n}{n!}$ , we can evaluate the integral in Eq. 26,

$$u(v) = e^{-\gamma bv} \left[ C v^\gamma - \sum_{n=0}^{\infty} \frac{(\gamma bv)^{n+1}}{n!(n-\gamma+1)} \right]. \quad (27)$$

We can also carry out the sum in Eq. 27 in the limit of  $\gamma \gg 1$  following Bender and Orzag [1]. By comparing the ratio of the  $n-1$ 'th and the  $n$ 'th term, we see that the elements of the sum have a maximum when  $n \simeq \gamma bv$ . For  $\gamma \gg 1$ , the sum will be dominated by terms with  $n$  near  $\gamma bv$ . We therefore let  $n = \gamma bv + s$  for some  $s$ , then  $n!$  can be shown to be approximately [1]

$$n! \simeq (\gamma bv)^n e^{-\gamma bv} e^{\frac{s^2}{2\gamma bv}} \sqrt{2\pi\gamma bv} \quad (28)$$

using Stirling's approximation. Consequently, by approximating the sum as an integral and extending the range of the integral to  $-\infty$ ,

$$\begin{aligned}
\sum_{n=0}^{\infty} \frac{(\gamma bv)^{n+1}}{n!(n-\gamma+1)} &\simeq \int_{-\infty}^{\infty} ds \frac{e^{-\frac{s^2}{2\gamma bv}}}{\sqrt{2\pi\gamma bv}} \cdot \frac{\gamma bve^{\gamma bv}}{\gamma(bv-1)+s+1} \\
&= \int_{-\infty}^{\infty} ds \frac{e^{-\frac{s^2}{2\gamma bv}}}{\sqrt{2\pi\gamma bv}} \cdot \frac{bve^{\gamma bv}}{bv-1} \left[1 + \gamma^{-1} \left(\frac{s+1}{bv-1}\right)\right]^{-1} \\
&= \frac{bve^{\gamma bv}}{bv-1} \int_{-\infty}^{\infty} ds \frac{e^{-\frac{s^2}{2\gamma bv}}}{\sqrt{2\pi\gamma bv}} + O(\gamma^{-1}) \\
&\simeq \frac{bve^{\gamma bv}}{bv-1}
\end{aligned} \tag{29}$$

to the lowest order in  $\gamma$ . From Eq. 27,  $u$  satisfies

$$u(v) \simeq Ce^{-\gamma bv} v^\gamma + \frac{bv}{1-bv} \tag{30}$$

when  $\gamma \gg 1$ . We evaluate  $C$  using  $u = u_0$  when  $v = v_0$  giving

$$\begin{aligned}
u &\simeq \left(u_0 - \frac{bv_0}{1-bv_0}\right) e^{-\gamma b(v-v_0)} \left(\frac{v}{v_0}\right)^\gamma + \frac{bv}{1-bv} \\
&\simeq \frac{bv}{1-bv}.
\end{aligned} \tag{31}$$

when  $\gamma \gg 1$  because  $v = v_0 e^\tau > v_0$  from Eq. 24.

## Finding the generating function

Using Eq. 31, Eq. 24 becomes

$$\frac{dF}{dv} = \frac{ab}{1-bv} F \tag{32}$$

or, on integrating,

$$\log \frac{F(v)}{F(v_0)} = -a \log \left(\frac{1-bv}{1-bv_0}\right) \tag{33}$$

because  $F(v_0) = F(\tau = 0)$ . If initially we have  $k$  proteins then

$$F(v_0) = \sum P_n(\tau = 0) z^n = \sum \delta_{n,k} z^n = z^k = (1+v_0)^k. \tag{34}$$

For our approximation, Eq. 31, to be valid, enough time must have passed for mRNA levels to have reached steady-state. Strictly, this initial condition is only valid for non-zero  $\tau$  of the order of  $d_1/d_0 = \gamma^{-1}$ . Finally, inserting Eq. 34 into Eq. 33 gives

$$F(z, \tau) = \left[\frac{1-b(z-1)e^{-\tau}}{1-bz+b}\right]^a \left[1+(z-1)e^{-\tau}\right]^k \tag{35}$$

because  $v_0 = (z-1)e^{-\tau}$ . When  $k = 0$ , Eq. 35 becomes Eq. 7.

## Deriving the probability distribution for proteins

We can find  $P_n(\tau)$ , the probability of having  $n$  proteins at time  $\tau$  given initially zero proteins, by differentiating Eq. 35 when  $k = 0$ . By definition,  $P_n$  satisfies  $P_n = \frac{1}{n!} \frac{\partial^n}{\partial z^n} F(z, \tau) \Big|_{z=0}$ . By writing

$$F(z, \tau) = \left( \frac{1 + be^{-\tau}}{1 + b} \right)^a \cdot \frac{\left[ 1 - \frac{b}{1+b}z \right]^{-a}}{\left[ 1 - \frac{b}{e^\tau + b}z \right]^{-a}}, \quad (36)$$

we can make use of the identities

$$\frac{\partial^n}{\partial z^n} [1 - qz]^{-a} \Big|_{z=0} = \frac{\Gamma(a+n)}{\Gamma(a)} q^n \quad (37)$$

and

$$\frac{\partial^n}{\partial z^n} \frac{x(z)}{y(z)} = n! \sum_{k=0}^n \frac{\partial^{n-k}}{\partial z^{n-k}} x(z) \cdot \sum_{j=0}^k \frac{(-1)^j (k+1) y(z)^{-j-1}}{(j+1)! (n-k)! (k-j)!} \frac{\partial^k}{\partial z^k} y(z)^j \quad (38)$$

which is given at Wolfram Research ([functions.wolfram.com/GeneralIdentities/9](http://functions.wolfram.com/GeneralIdentities/9)).

Interpreting  $x(z)$  as the numerator of the quotient in Eq. 36 and  $y(z)$  as its denominator, we find

$$\begin{aligned} P_n(\tau) &= \left( \frac{1 + be^{-\tau}}{1 + b} \right)^a \sum_{k=0}^n \frac{\Gamma(a+n-k)}{\Gamma(a)} \left( \frac{b}{1+b} \right)^{n-k} \\ &\times \sum_{j=0}^k \frac{(-1)^j (k+1)}{(j+1)! (n-k)! (k-j)!} \cdot \frac{\Gamma(aj+k)}{\Gamma(aj)} \cdot \left( \frac{b}{e^\tau + b} \right)^k \end{aligned} \quad (39)$$

where we can use

$$\sum_{j=1}^k \frac{(-1)^j \Gamma(aj+k)}{\Gamma(aj)(j+1)!(k-j)!} = \frac{(-1)^k \Gamma(a+1)}{\Gamma(a-k+1)(k+1)!} \quad (40)$$

to simplify further. Eq. 40 can be verified by directly expanding the sum. Consequently,

$$P_n(\tau) = \left( \frac{b}{1+b} \right)^n \left( \frac{1 + be^{-\tau}}{1 + b} \right)^a \sum_{k=0}^n \frac{(-1)^k}{k!} \frac{\Gamma(a-k+n)}{\Gamma(n-k+1)\Gamma(a-k+1)} \left( \frac{1+b}{e^\tau + b} \right)^k. \quad (41)$$

The hypergeometric function  ${}_2F_1(a, b, c; z)$  obeys

$${}_2F_1(-n, b, c; z) = \sum_{k=0}^n (-1)^k \frac{\Gamma(n+1)}{\Gamma(n-k+1)} \frac{(b)_k z^k}{(c)_k k!} \quad (42)$$

when  $a$  is a negative integer and where  $(b)_k$  and  $(c)_k$  are Pochhammer symbols [2]. From their definition,  $(a)_k = \Gamma(a+k)/\Gamma(a)$ , the Pochhammer symbols satisfy

$$\Gamma(a+1) = (-1)^k (-a)_k \Gamma(a-k+1). \quad (43)$$

Writing  $\Gamma(a-k+n) = \Gamma(a+n-1-k+1)$  and using Eq. 42 and Eq. 43, we find that

$$P_n(\tau) = \frac{1}{n!} \left( \frac{b}{1+b} \right)^n \left( \frac{1 + be^{-\tau}}{1 + b} \right)^a \frac{\Gamma(a+n)}{\Gamma(a)} {}_2F_1 \left( -n, -a, 1-a-n; \frac{1+b}{e^\tau + b} \right) \quad (44)$$

which is valid for  $\gamma \gg 1$ ,  $\tau > \gamma^{-1}$ , and  $a$  and  $b$  finite.

## Deriving the ‘propagator’ probability

By differentiating Eq. 35 for non-zero  $k$ , we can express the ‘propagator’ probability,  $P_{n|k}(\tau)$ , in terms of Eq. 44. From the definition of  $P_n(\tau)$ , Eq. 35 can be written as

$$F(z, \tau) = \left[ \sum_{n=0}^{\infty} P_n(\tau) z^n \right] [1 - e^{-\tau} + ze^{-\tau}]^k \quad (45)$$

or

$$F(z, \tau) = \sum_{n=0}^{\infty} P_n(\tau) z^n \sum_{r=0}^k \binom{k}{r} (1 - e^{-\tau})^{k-r} (ze^{-\tau})^r \quad (46)$$

using the binomial theorem. From the coefficients of the powers of  $z$ , we find

$$P_{n|k}(\tau) = \sum_{r=0}^k \binom{k}{r} P_{n-r}(\tau) (1 - e^{-\tau})^{k-r} e^{-r\tau} \quad (47)$$

because  $F(z, \tau) = \sum_n P_{n|k}(\tau) z^n$  and remembering that  $P_n(\tau) = 0$  if  $n < 0$ .

## Finding the probability distribution for the first passage time

With  $P_n(\tau)$  and  $P_{n|k}(\tau)$ , we can find the distribution for the first time the number of proteins reaches a threshold  $N$ . We define this distribution to be  $f_N(\tau)$ . It obeys a renewal equation [3]

$$P_N(\tau) = \int_0^{\tau} d\tau' f_N(\tau') P_{N|N}(\tau - \tau'). \quad (48)$$

The probability of having  $N$  proteins at time  $\tau$  is equal to the sum of the probability of first reaching  $N$  proteins at  $\tau'$  and then returning to  $N$  proteins at a time  $\tau - \tau'$  later for all times  $\tau'$  less than  $\tau$ . We have assumed that the initial number of proteins is zero, but this assumption is not necessary.

Eq. 48 is a Volterra integral equation of the first kind and can be straightforwardly solved numerically [4]. If  $N > 0$  then  $f_N(0) = 0$  and  $P_{N|N}(0) = 1$  by definition. Consequently, by discretizing and letting  $\tau_i = i\epsilon$  for integer  $i$  and small  $\epsilon$ , we can write the integral in Eq. 48 as a trapezium rule:

$$\int_0^{\tau_i} d\tau' f_N(\tau') P_{N|N}(\tau_i - \tau') \simeq \epsilon \left[ \frac{1}{2} f_N(\tau_i) + \sum_{j=1}^{i-1} P_{N|N}(\tau_i - \tau_j) f_N(\tau_j) \right]. \quad (49)$$

Inserting Eq. 49 into Eq. 48 gives a series of equations for  $f_N(\tau_i)$  which we solve iteratively:

$$f_N(\tau_1) = \frac{2P_N(\tau_1)}{\epsilon} \quad (50)$$

$$f_N(\tau_i) = 2 \left[ \frac{P_N(\tau_i)}{\epsilon} - \sum_{j=1}^{i-1} P_{N|N}(\tau_i - \tau_j) f_N(\tau_j) \right]. \quad (51)$$

We implement Eqs. 50 and 51 in Matlab (The Mathworks, Natick, Massachusetts). Our code is available at [www.cnd.mcgill.ca/~swain](http://www.cnd.mcgill.ca/~swain).

We use

$$\langle n(\tau_1)n(\tau_2) \rangle = \sum_{n,n'} nn' P_{n|n'}(\tau_2 - \tau_1) P_{n'}(\tau_1) \quad (52)$$

to find the auto-correlation function. We evaluate the sum in Eq. 52 numerically, cutting off the sums when  $n$  is many times the mean steady-state value:  $\langle n \rangle = ab$ .

## High $\gamma$ implies bursts of protein synthesis

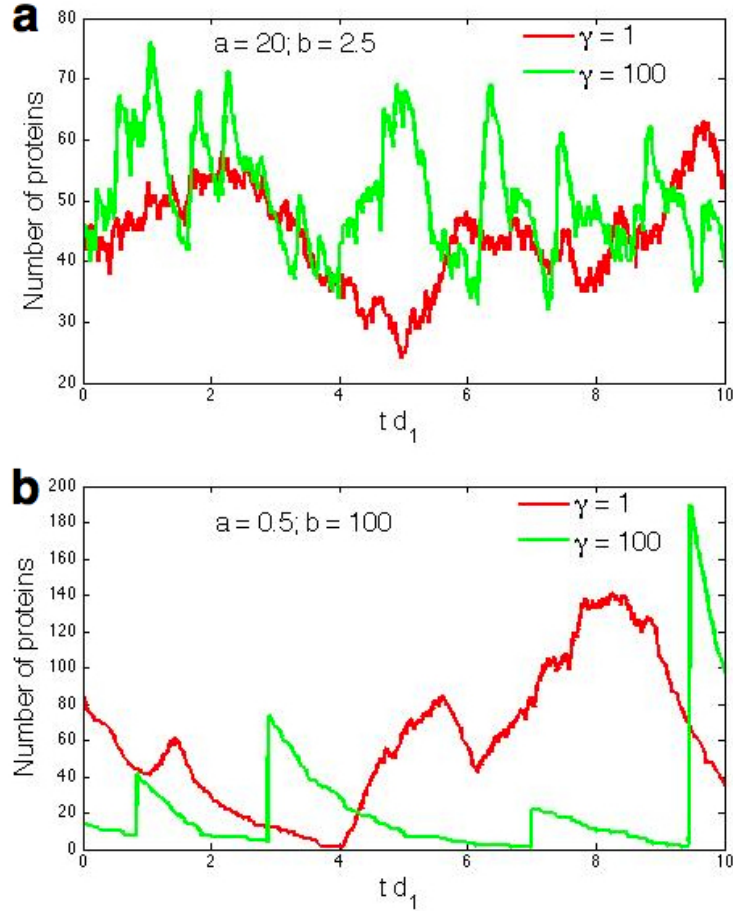

Figure 5: As  $\gamma$  increases, protein synthesis occurs in bursts. Time courses of protein numbers from simulations of the two-stage model of Fig. 1. When  $\gamma$  is increased to 100 from 1, we see steep bursts of synthesis: short-lived mRNAs are only able to be occasionally translated before being degraded. The protein degradation rate is  $d_1 = 0.0005\text{s}^{-1}$ . **a**  $a = 20$  and  $b = 2.5$ . **b**  $a = 0.5$  and  $b = 100$ . Both examples have a mean protein number of 50.

## Solving the master equation for bursts of protein synthesis

When  $\gamma \gg 1$ , the distribution for protein numbers can also be derived by only considering  $P_n(\tau)$ , the probability of having  $n$  proteins at time  $\tau$ , if this probability obeys a master equation where proteins are synthesized in bursts. We let the size  $r$  of a burst obey a geometric distribution,

$$P(r) = \left(\frac{b}{1+b}\right)^r \left(1 - \frac{b}{1+b}\right). \quad (53)$$

The corresponding master equation is

$$\frac{\partial P_n}{\partial \tau} = a \left[ \left(1 - \frac{b}{1+b}\right) \sum_{r=0}^n \left(\frac{b}{1+b}\right)^r P_{n-r} - P_n \right] + (n+1)P_{n+1} - nP_n \quad (54)$$

which can be converted into an equation for the generating function,  $F(z) = \sum_n z^n P_n(\tau)$ .

The generating function obeys

$$\frac{\partial F}{\partial \tau} = (1-z) \frac{\partial F}{\partial z} - aF + a \left(1 - \frac{b}{1+b}\right) \sum_{n=0}^{\infty} \sum_{r=0}^n z^n \left(\frac{b}{1+b}\right)^r P_{n-r} \quad (55)$$

where we need to evaluate the sums over  $n$  and  $r$ . Relabelling and resumming

$$\begin{aligned} \sum_{n=0}^{\infty} \sum_{r=0}^n z^n \left(\frac{b}{1+b}\right)^r P_{n-r} &= \sum_{n=0}^{\infty} \sum_{k=0}^n z^n \left(\frac{b}{1+b}\right)^{n-k} P_k \\ &= \sum_{k=0}^{\infty} \left(\frac{b}{1+b}\right)^{-k} P_k \sum_{n=k}^{\infty} \left(\frac{bz}{1+b}\right)^n \\ &= \sum_{k=0}^{\infty} \frac{P_k \left(\frac{bz}{1+b}\right)^k}{\left(1 - \frac{bz}{1+b}\right) \left(\frac{b}{1+b}\right)^k} \\ &= \frac{F(z)}{1 - \frac{bz}{1+b}} \end{aligned} \quad (56)$$

where we use the definition of the generating function. Consequently, Eq. 55 becomes

$$\frac{\partial F}{\partial \tau} = (1-z) \frac{\partial F}{\partial z} + \left(\frac{1 - \frac{b}{1+b}}{1 - \frac{bz}{1+b}} - 1\right) aF \quad (57)$$

or

$$\frac{1}{v} \frac{\partial F}{\partial \tau} + \frac{\partial F}{\partial v} = \frac{ab}{1-bv} F \quad (58)$$

with  $v = z - 1$ . This partial differential equation is Eq. 23 when  $\gamma \gg 1$  and Eq. 31 holds.

## Derivation of the gamma distribution for protein numbers

We can derive the gamma distribution for protein numbers found by Friedman *et al.* [5] when  $n$  is large. If  $P(n|a, b)$  is the negative binomial distribution and  $\Gamma(n|a, b)$  is the gamma distribution, then

$$P(n|a, b) = \int_0^{\infty} d\lambda \frac{e^{-\lambda} \lambda^n}{n!} \Gamma(\lambda|a, b) \quad (59)$$

which is a general relation between the negative binomial and gamma distributions. It can be verified by evaluating the integral using the definition of a gamma function [2]. If we approximate the Poisson distribution by a normal distribution and write  $z = \lambda - n$ , Eq. 59 becomes

$$\begin{aligned} P(n|a, b) &\simeq \int_{-\infty}^{\infty} dz \frac{e^{-\frac{z^2}{2(z+n)}}}{\sqrt{2\pi(z+n)}} \Gamma(z+n|a, b) \\ &= \int_{-\infty}^{\infty} dz \frac{e^{-\frac{z^2}{2n} \left(1 + \frac{z}{n}\right)^{-1}}}{\sqrt{2\pi n}} \cdot \left(1 + \frac{z}{n}\right)^{-\frac{1}{2}} \Gamma\left(n \left[1 + \frac{z}{n}\right] \middle| a, b\right). \end{aligned} \quad (60)$$

We note that only values of  $z$  close to zero contribute to the integral when  $n \gg 1$  because  $z = 0$  is the minimum of the exponent in the integrand. Then  $n \gg 1$  implies  $z/n \ll 1$ , and so

$$\begin{aligned} P(n|a, b) &\simeq \int_{-\infty}^{\infty} dz \frac{e^{-\frac{z^2}{2n}}}{\sqrt{2\pi n}} \Gamma(n|a, b) \\ &= \Gamma(n|a, b) \end{aligned} \quad (61)$$

for large  $n$ , as expected [5].

## Derivation of the protein distribution for a three-stage model of gene expression

We can use the same approximation of large  $\gamma$  to find the protein distribution for the three-stage model. Let  $P_{m,n}^{(0)}$  be the probability of having  $m$  mRNAs and  $n$  proteins when the DNA is inactive and  $P_{m,n}^{(1)}$  be the probability of having  $m$  mRNAs and  $n$  proteins when the DNA is active. The master equation consists of two coupled equations:

$$\begin{aligned} \frac{\partial P_{n,m}^{(0)}}{\partial \tau} &= \kappa_1 P_{m,n}^{(1)} - \kappa_0 P_{m,n}^{(0)} + (n+1)P_{m,n+1}^{(0)} - nP_{m,n}^{(0)} \\ &\quad + \gamma \left[ (m+1)P_{m+1,n}^{(0)} - mP_{m,n}^{(0)} + bm \left( P_{m,n-1}^{(0)} - P_{m,n}^{(0)} \right) \right] \end{aligned} \quad (62)$$

$$\begin{aligned} \frac{\partial P_{n,m}^{(1)}}{\partial \tau} &= -\kappa_1 P_{m,n}^{(1)} + \kappa_0 P_{m,n}^{(0)} + (n+1)P_{m,n+1}^{(1)} - nP_{m,n}^{(1)} + a \left( P_{m-1,n}^{(1)} - P_{m,n}^{(1)} \right) \\ &\quad + \gamma \left[ (m+1)P_{m+1,n}^{(1)} - mP_{m,n}^{(1)} + bm \left( P_{m,n-1}^{(1)} - P_{m,n}^{(1)} \right) \right] \end{aligned} \quad (63)$$

where  $\kappa_0 = k_0/d_1$  and  $\kappa_1 = k_1/d_1$ . By defining two generating functions

$$f^{(0)}(z', z) = \sum_{m,n} (z')^m z^n P_{m,n}^{(0)} \quad ; \quad f^{(1)}(z', z) = \sum_{m,n} (z')^m z^n P_{m,n}^{(1)}, \quad (64)$$

these equations become

$$\frac{1}{v} \frac{\partial f^{(0)}}{\partial \tau} = \frac{1}{v} \left[ \kappa_1 f^{(1)} - \kappa_0 f^{(0)} \right] - \frac{\partial f^{(0)}}{\partial v} + \gamma \left[ b(1+u) - \frac{u}{v} \right] \frac{\partial f^{(0)}}{\partial u} \quad (65)$$

$$\frac{1}{v} \frac{\partial f^{(1)}}{\partial \tau} = \frac{1}{v} \left[ -\kappa_1 f^{(1)} + \kappa_0 f^{(0)} \right] - \frac{\partial f^{(1)}}{\partial v} + a \frac{u}{v} f^{(1)} + \gamma \left[ b(1+u) - \frac{u}{v} \right] \frac{\partial f^{(1)}}{\partial u} \quad (66)$$

with  $u = z' - 1$  and  $v = z - 1$ .

At steady-state  $\frac{\partial f^{(0)}}{\partial \tau} = \frac{\partial f^{(1)}}{\partial \tau} = 0$ , and we find using the method of characteristics that

$$\begin{aligned} \frac{dv}{dr} &= 1 & ; & \quad \frac{du}{dr} = -\gamma \left[ b(1+u) - \frac{u}{v} \right] \\ \frac{df^{(0)}}{dr} &= \frac{1}{v} \left[ \kappa_1 f^{(1)} - \kappa_0 f^{(0)} \right] & ; & \quad \frac{df^{(1)}}{dr} = \frac{1}{v} \left[ -\kappa_1 f^{(1)} + \kappa_0 f^{(0)} \right] + a \frac{u}{v} f^{(1)} \end{aligned} \quad (67)$$

where  $r$  measures the distance along a characteristic. Both  $u$  and  $v$  obey Eq. 24 again. Consequently,  $v = r$  and  $u \simeq \frac{bv}{1-bv}$  from Eq. 31 when  $\gamma \gg 1$ . From Eq. 67, we therefore obtain the two coupled differential equations:

$$v \frac{df^{(0)}}{\partial v} = \kappa_1 f^{(1)} - \kappa_0 f^{(0)} \quad (68)$$

$$v \frac{df^{(1)}}{\partial v} = -\kappa_1 f^{(1)} + \kappa_0 f^{(0)} + \frac{abv}{1-bv} f^{(1)}. \quad (69)$$

Following Hornos *et al.* [6], Eqs. 68 and 69 can be reduced to one differential equation for  $f^{(0)}(v)$  by solving Eq. 68 for  $f^{(1)}$  in terms of  $f^{(0)}$  and its derivative, and inserting the result into Eq. 69. This equation becomes a second-order differential equation:

$$v(bv - 1)\frac{df^{(0)}}{dv^2} + [(\kappa_0 + \kappa_1)(bv - 1) + bv(1 + a) - 1]\frac{df^{(0)}}{dv} + ab\kappa_0 f^{(0)} = 0. \quad (70)$$

Eq. 70 has solution

$$f^{(0)}(v) = C {}_2F_1(\alpha, \beta, 1 - \kappa_0 - \kappa_1; bv) \quad (71)$$

where  ${}_2F_1(a, b, c; z)$  is a hypergeometric function,

$$\alpha = \frac{1}{2} \left( a + \kappa_0 + \kappa_1 + \sqrt{(a + \kappa_0 + \kappa_1)^2 - 4a\kappa_0} \right) \quad (72)$$

$$\beta = \frac{1}{2} \left( a + \kappa_0 + \kappa_1 - \sqrt{(a + \kappa_0 + \kappa_1)^2 - 4a\kappa_0} \right), \quad (73)$$

and  $C$  is a constant of integration.

We can find the generating function for protein numbers,  $F(z) = f^{(0)}(z) + f^{(1)}(z)$ , by using our solution for  $f^{(0)}$  and Eq. 68 to find  $f^{(1)}$ . Determining the constant of integration  $C$  from  $F(1) = 1$  and using the relation  $c(c+1) {}_2F_1(a, b, c; z) = c(c+1) {}_2F_1(a, b, c+1; z) + abz {}_2F_1(a+1, b+1, c+2; z)$ , we find that

$$F(z) = {}_2F_1(\alpha, \beta, \kappa_0 + \kappa_1; b(z - 1)), \quad (74)$$

replacing  $v$  by  $z - 1$ .

Expanding the generating function around  $z = 0$  determines the probabilities  $P_n$ . Using properties of the  $n$ -th derivatives with respect to  $z$  of the hypergeometric function,  ${}_2F_1^{(n)}(a, b, c; z)$ , we can write

$$\begin{aligned} F(z) &= \sum_{n=0}^{\infty} {}_2F_1^{(n)}(\alpha, \beta, \kappa_0 + \kappa_1; -b) \frac{b^n}{n!} z^n \\ &= \sum_{n=0}^{\infty} \frac{\Gamma(\alpha + n)\Gamma(\beta + n)\Gamma(\kappa_0 + \kappa_1)b^n}{\Gamma(\alpha)\Gamma(\beta)\Gamma(\kappa_0 + \kappa_1 + n)n!} {}_2F_1(\alpha + n, \beta + n, \kappa_0 + \kappa_1 + n; -b) z^n \end{aligned} \quad (75)$$

and  $P_n$  can be found from the definition of  $F(z)$ :  $F(z) = \sum_n P_n z^n$ . With the linear transformation formulae for hypergeometric functions [2], we write  $P_n$  as

$$\begin{aligned} P_n &= \frac{\Gamma(\alpha + n)\Gamma(\beta + n)\Gamma(\kappa_0 + \kappa_1)}{\Gamma(n + 1)\Gamma(\alpha)\Gamma(\beta)\Gamma(\kappa_0 + \kappa_1 + n)} \left( \frac{b}{1 + b} \right)^n \left( 1 - \frac{b}{1 + b} \right)^\alpha \\ &\quad \times {}_2F_1 \left( \alpha + n, \kappa_0 + \kappa_1 - \beta, \kappa_0 + \kappa_1 + n; \frac{b}{1 + b} \right). \end{aligned} \quad (76)$$

## The exact mRNA distributions

For completeness, we include the mRNA distributions for the two-stage and three-stage models. With initially zero mRNAs, the two-stage model has a Poisson distribution:

$$P_m(t) = e^{-\langle m(t) \rangle} \frac{\langle m(t) \rangle^m}{m!} \quad (77)$$



where  $\langle m(t) \rangle = m_s (1 - e^{-d_0 t})$  and  $m_s = v_0/d_0$  is the steady-state number of mRNAs. The propagator probability satisfies

$$P_{m|k}(t) = \sum_{r=0}^k \binom{k}{r} P_{m-r}(t) (1 - e^{-d_0 t})^{k-r} e^{-rd_0 t} \quad (78)$$

with  $P_m(t) = 0$  if  $m < 0$ .

The steady-state distribution of mRNA for the three-stage model was first derived by Peccoud and Ycart, although they did not recognize it as such [7], and also by Raj *et al.* [8]. The exact probability of having  $m$  RNAs at steady-state is

$$P_m = \frac{m_s^m e^{-m_s}}{m!} \cdot \frac{\Gamma(\zeta_0 + m)\Gamma(\zeta_0 + \zeta_1)}{\Gamma(\zeta_0 + \zeta_1 + m)\Gamma(\zeta_0)} {}_1F_1(\zeta_1, \zeta_0 + \zeta_1 + m; m_s) \quad (79)$$

where  $m_s = v_0/d_0$ ,  $\zeta_0 = k_0/d_0$ , and  $\zeta_1 = k_1/d_0$ , and  ${}_1F_1(a, b; z)$  is the confluent hypergeometric function of the first kind [2]. Eq. 79 like Eq. 18 can be bimodal. For  $\zeta_1 = k_1/d_0 \gg 1$ , Eq. 79 tends to a negative binomial distribution [8], because then mRNA synthesis is more burst-like. The distribution becomes Poisson when  $k_1$  is zero, and the three-stage model reduces to the two-stage model.

## References

- [1] Bender, C. M. and Orzag, S. A. *Advanced Mathematical Methods for Scientists and Engineers*. Springer, New York, New York, (1999).
- [2] Abramowitz, M. and Stegun, I. A. *Pocketbook of Mathematical Functions*. Harri Deutsch Publishing, Frankfurt am Main, (1984).
- [3] van Kampen, N. G. *Stochastic Processes in Physics and Chemistry*. Elsevier, New York, New York, (1990).
- [4] Press, W. H., Teukolsky, S. A., Vetterling, W. T., and Flannery, B. P. *Numerical recipes in C++*. Cambridge University Press, New York, New York, (2002).
- [5] Friedman, N., Cai, L., and Xie, X. S. Linking stochastic dynamics to population distribution: an analytical framework of gene expression. *Phys. Rev. Lett.* **97**, 16830 (2006).
- [6] Hornos, J. E., Schultz, D., Innocentini, G. C., Wang, J., Walczak, A. M., Onuchic, J. N., and Wolynes, P. G. Self-regulating gene: an exact solution. *Phys. Rev. E.* **72**, 051907 (2005).
- [7] Peccoud, J. and Ycart, B. Markovian modeling of gene-product synthesis. *Theor. Popul. Biol.* **48**, 222–234 (1995).
- [8] Raj, A., Peskin, C. S., Tranchina, D., Vargas, D. Y., and Tyagi, S. Stochastic mRNA synthesis in mammalian cells. *PLoS Biol.* **4**, e309 (2006).
